# Supplementary material for: An Optimized Checkerboard Method for Phage-Antibiotic Synergy Detection
Source: MDPI journal article supplement (doi:10.3390/v14071542), 2022-07-14
Supplement: s1 [file s1]

**Table S1.** MIC of antibiotics.

|                                 |  | MIC (µg mL <sup>-1</sup> ) |       |       |      |
|---------------------------------|--|----------------------------|-------|-------|------|
| Strain                          |  | CIP                        | GEN   | CRO   | OXA  |
| <i>P. aeruginosa</i> UCBPP-PA14 |  | 0.125                      | 0.50  | 32.00 | NA   |
| <i>S. aureus</i> ATCC 43300     |  | 0.50                       | 32.00 | NA    | 2.00 |

NA not applicable.

**Table S2.** MIM of bacteriophages.

|                                 |       | MIM   |          |
|---------------------------------|-------|-------|----------|
| Strain                          | JG024 | MSA6  | SES43300 |
| <i>P. aeruginosa</i> UCBPP-PA14 | 1     | NA    | NA       |
| <i>S. aureus</i> ATCC 43300     | NA    | 0.001 | 0.0001   |

NA not applicable.
